# Supplementary material for: Dual responsive curcumin loaded N-isopropylacrylamide/acrylated linseed oil copolymeric hydrogel films: tuned LCST with value-added properties
Source: Royal Society of Chemistry journal article supplement (doi:10.1039/d4nj03560g), 2024-01-01
Supplement: d4nj03560g1.pdf [file d4nj03560g1.pdf]

1 **Supporting information**

2

3 **Dual responsive Curcumin loaded N-Isopropylacrylamide/Acrylated linseed oil**  
4 **copolymeric hydrogel films: Tuned LCST with value-added properties**

5 P.A Parvathy <sup>a,b</sup>, Victor A Ajisafe <sup>c</sup>, Ashok M Raichur <sup>c</sup>, Sushanta K. Sahoo\* <sup>a,b</sup>

6 a. Materials Science and Technology Division, CSIR-National Institute for Interdisciplinary Science and  
7 Technology, Thiruvananthapuram 695019, India

8 b. Academy of Scientific and Innovative Research (AcSIR), Ghaziabad- 201002, India

9 c. Department of Materials Engineering, Indian Institute of Science (IISc), Bangalore 560012, Karnataka, India.

10

11

12

13

14

15

16

17

18

19 **Author Information**

20 Corresponding Author

21 \*E-mail: sushanta@niist.res.in; Tel +91-471-2515373 (S.K.S)

22 **ORCID**

23 Sushanta K Sahoo: 0000-0003-4845-1049

## 24 **Materials**

25 Linseed oil (L.O.) ( $\alpha$ -linolenic acid 51.9-55.2 %, palmitic acid 7 %, stearic acid 3.4-4.6 %,  
26 oleic acid 18.5-22.6 %, linolenic acid 14.2-17 %) was purchased from HIMEDIA. Acrylic  
27 acid and  $\text{CDCl}_3$  were procured from Sigma-Aldrich. Hydroquinone and N, N, N, N'-  
28 Tetramethyl ethylenediamine (TEMED) were obtained from TCI chemicals. 30 % w/v  
29 hydrogen peroxide ( $\text{H}_2\text{O}_2$ ) was procured from Nice chemicals. Seralite SRC 120 was  
30 obtained from SRL Pvt. Ltd, India. Glacial acetic acid, sodium carbonate, sodium bicarbonate  
31 and sodium sulfate were procured from Merck.

## 32 **Experimental section**

### 33 **Synthesis of Acrylated epoxidized linseed oil (AELO)**

34 Acrylated epoxidized linseed oil (AELO) was prepared via a two-step process reported by  
35 our group (**Scheme S1**)<sup>1</sup>. Initially, linseed oil was epoxidized employing Prilezhaev  
36 epoxidation. 79 g of linseed oil was added to the 3-neck round bottom flask connected with  
37 magnetic stirrer, followed by the addition of 30 g glacial acetic acid and seralite (19.75 g)  
38 mixture and stirred for 30 min. After this, 113 g of  $\text{H}_2\text{O}_2$  was added using a dropping funnel,  
39 and then the reaction was carried out for 6 hr by maintaining the temperature between 55-60  
40 °C. Afterward, the epoxidized layer was separated using filtration and washed with 2 wt.%  
41  $\text{Na}_2\text{CO}_3$  solution and then distilled water. Epoxidized linseed oil (ELO) was then passed  
42 through anhydrous sodium sulphate and dried using a vacuum oven.

43 For the acrylation process, 65 g of ELO and 0.5 wt. % hydroquinone were thoroughly mixed  
44 in a two-neck round bottom flask. 19.58 g of acrylic acid was introduced dropwise to the  
45 reaction media using a dropping funnel with continuous stirring. 1.23g (1.5 wt.% ELO+AA  
46 mixture) of triphenylphosphine was added as a catalyst. The reaction continued for 6 hr at  
47 110 °C. Acrylated epoxidized linseed oil (AELO) was washed with 2 wt.%  $\text{NaHCO}_3$  solution

48 and passed over anhydrous  $\text{Na}_2\text{SO}_4$ . Further drying of AELO was performed in a vacuum  
49 oven.

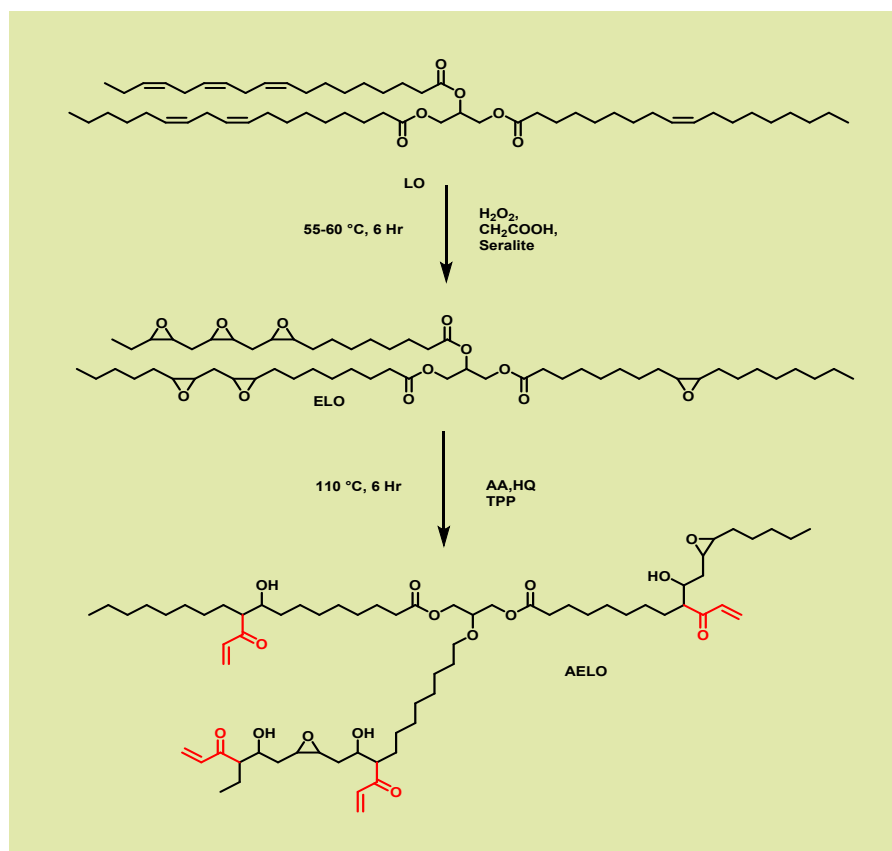

50

51

**Scheme S1. Acrylation of epoxidized linseed oil**

## 52 Characterization

53  $^1\text{H}$  NMR spectrum was recorded using the 500 MHz Bruker Advance DPX spectrometer  
54 using  $\text{CDCl}_3$  as solvent.

55

## 56 Results and discussion

### 57 Functional group analysis

58 ATR-FTIR and  $^1\text{H}$  NMR (**Fig. S1**) are used to validate the formation of ELO and AELO. The  
59 typical peak associated with C-H stretching from LO's  $\text{C}=\text{C}-\text{H}$  at  $3015\text{ cm}^{-1}$  is noticeably  
60 diminished in ELO, as shown in **Fig. S1**<sup>1</sup>. The peak at  $1654\text{ cm}^{-1}$  attributed to  $\text{C}=\text{C}$  is not

61 prominent in ELO, confirming that LO had undergone epoxidation. The vibration seen at 822  
62  $\text{cm}^{-1}$  repeatedly confirms the epoxidation of linseed oil. The acrylate moiety's double bond in  
63 AELO is shown as a doublet at 1637 and 1619  $\text{cm}^{-1}$ . The  $\text{CH}_2$  scissoring vibration of  $\text{CH}_2=\text{C}$   
64 in the acrylate group is represented by the peak at 1406  $\text{cm}^{-1}$ . The peaks at 984 and 966  $\text{cm}^{-1}$   
65 and those at 1296  $\text{cm}^{-1}$  and 1272  $\text{cm}^{-1}$  are attributed to C-H scissoring vibration in acrylate  
66  $\text{CH}=\text{C}$  and  $\text{CH}_2$  rocking vibration of  $\text{CH}_2$  in the acrylate groups, respectively<sup>2,3</sup>.

67 Epoxidation and acrylation are further confirmed with  $^1\text{H}$  NMR. The olefinic hydrogen atoms  
68 of double bond in LO. appeared at 5.3 ppm, which has significantly reduced in ELO. The  
69 characteristic peaks of -CH- protons from epoxide moiety occurred at 2.9-3.12 ppm in ELO,  
70 validating the epoxidation of LO. Three successive peaks at 5.8–6.5 ppm are seen after  
71 acrylation, and these peaks correspond to the three acrylate group protons in AELO<sup>2,3</sup>. Proton  
72 peaks corresponding to the epoxy ring observed in the AELO spectrum with reduced  
73 intensity suggest that complete acrylation is impossible. This might be due to the steric ratio  
74 between the area of the epoxide peaks ( $^1\text{H}$  NMR) peak at 2.85-3.2 ppm and the area of the  
75 unsaturation bond peak, which appeared at 5.27–5.45 ppm, is used to calculate the degree of  
76 epoxidation, which was calculated to be 82 %. In a similar method, the degree of acrylation  
77 was calculated by dividing the area of the acrylate group by the sum of the areas of epoxy and  
78 acrylate, and it was calculated to be 56 %<sup>4</sup>.

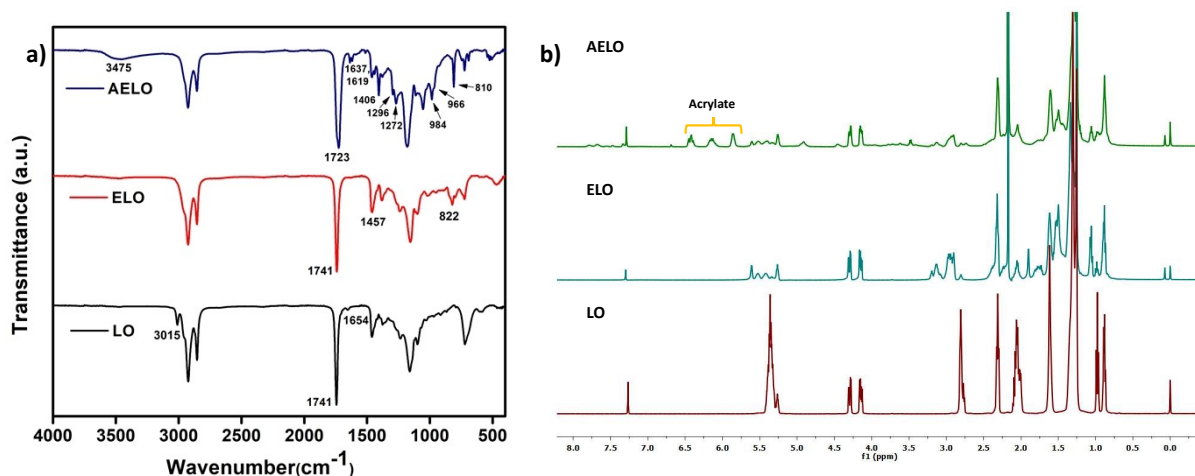

79

80 Fig. S1. a) ATR-FTIR comparison analysis and b)  $^1\text{H}$  NMR analysis of LO., ELO and  
81 AELO

82 Swelling studies

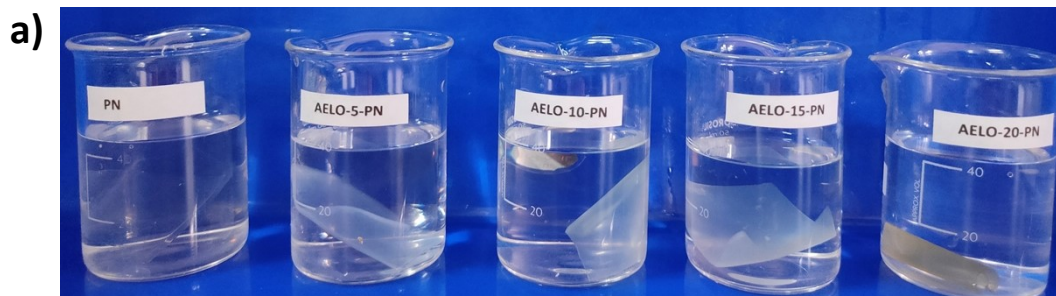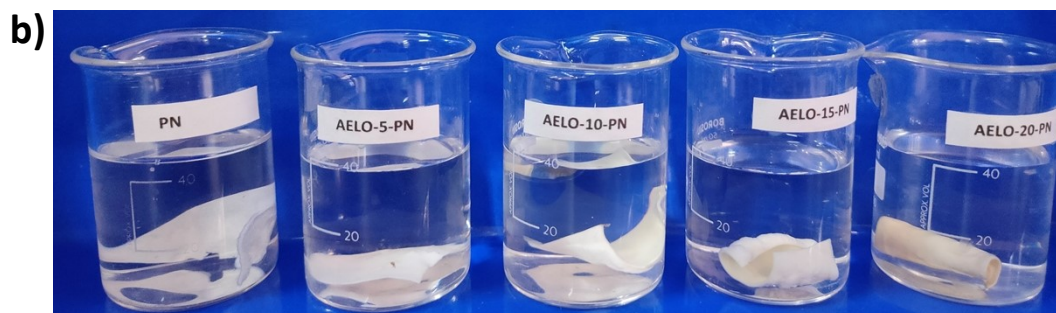

83

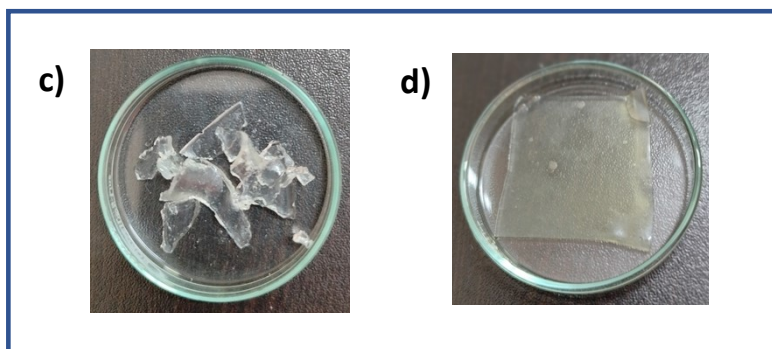

84

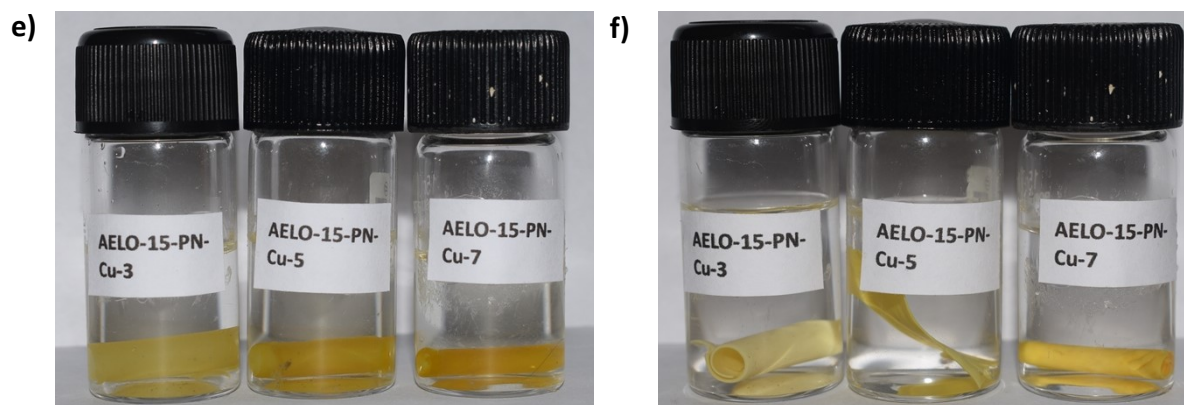

85

86 **Fig. S2. (a) Images of the swelled samples at 27 °C and (b) at 40 °C (c) image of the PN.**  
87 **after equilibrium swelling and (d) image of the AELO incorporated sample after**  
88 **equilibrium swelling, (e) images of curcumin incorporated films at 27 °C and (f) at 40**  
89 **°C**

90

91 **Table S1. Equilibrium swelling capacity of hydrogel films.**

| <b>Sample</b>          | <b>Equilibrium swelling at 27<br/>°C (g/g)</b> |
|------------------------|------------------------------------------------|
| <b>PN</b>              | 9.87±0.114                                     |
| <b>AELO-5-PN</b>       | 4.50±0.089                                     |
| <b>AELO-10-PN</b>      | 3.03±0.121                                     |
| <b>AELO-15-PN</b>      | 2.28±0.091                                     |
| <b>AELO-20-PN</b>      | 1.36±0.098                                     |
| <b>AELO-15-PN-Cu-3</b> | 1.02±0.009                                     |
| <b>AELO-15-PN-Cu-5</b> | 0.82±0.009                                     |
| <b>AELO-15-PN-Cu-7</b> | 0.72±0.011                                     |

92

93

94

95

96

97

98

99 **DMA Analysis**

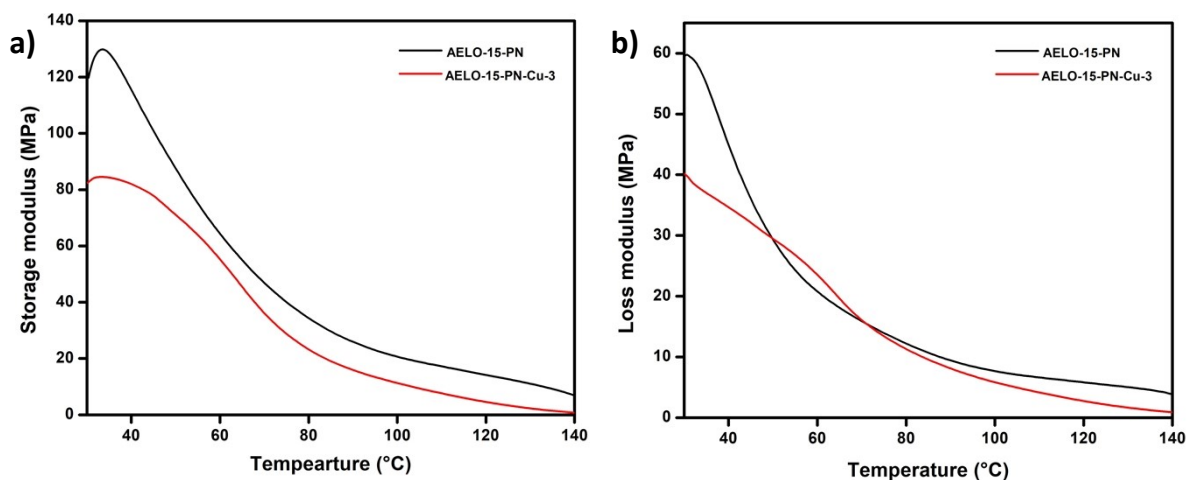

100

101 **Fig. S3. Comparison of (a) storage and (b) loss modulus of AELO-15-PN and AELO-15-**  
 102 **PN-Cu-3**

103

104 **Colour changes with different pH**

105 **Table S2: Colour parameter analysis**

|                 | Dry sample |      |       | pH 4  |       |       | pH 7.4 |       |       | pH 9.2 |       |       |
|-----------------|------------|------|-------|-------|-------|-------|--------|-------|-------|--------|-------|-------|
|                 | L          | a    | b     | L     | a     | b     | L      | a     | b     | L      | a     | b     |
| AELO-15-PN-Cu-3 | 81.82      | -    | 44.79 | 82.68 | -4.29 | 39.43 | 80.6   | -2.23 | 36.79 | 77.46  | 2.4   | 40.53 |
|                 |            | 6.69 |       |       |       |       |        |       |       |        |       |       |
| AELO-15-PN-Cu-5 | 80.57      | -5   | 64.52 | 80.81 | -3.43 | 62.04 | 73.92  | 1.33  | 61.01 | 66.98  | 12.32 | 61.02 |
| AELO-15-PN-Cu-3 | 74.44      | 6.4  | 74.81 | 73.9  | 4.05  | 73.63 | 66.34  | 14.14 | 58.73 | 57.37  | 24.58 | 53.82 |

106

107

108 **References**

109 1 R. Paul, B. John and S. K. Sahoo, *Biomacromolecules*, 2022, **23**, 816–828.

110 2 Y. Su, S. Zhang, Y. Chen, T. Yuan and Z. Yang, *Prog. Org. Coatings*, 2020, **148**,  
111 105820.

112 3 S. K. Sahoo, V. Khandelwal and G. Manik, *Int. J. Adhes. Adhes.*, 2019, **89**, 174–177.

113 4 M. Jebrane, S. Cai, C. Sandström and N. Terziev, *Express Polym. Lett.*, 2017, **11**, 383–  
114 395.

115
